# Supplementary material for: Occurrence of Thromboembolic Events and Mortality Among Hospitalized Coronavirus 2019 Patients: Large Observational Cohort Study of Electronic Health Records
Source: PubMed Central journal article supplement (PMC9674436; doi:10.1055/a-1937-9692), 2022-11-18
Supplement: 10-1055-a-1937-9692-s22080035.pdf [file 10-1055-a-1937-9692-s22080035.pdf]

## Supplemental Materials

**Supplemental Table S1** Codes for identification of COVID-19 patients<sup>46–49</sup>

| Diagnosis codes (ICD-10-CM)                 |                                                                           |                                                                                                                                                                                                                                               |
|---------------------------------------------|---------------------------------------------------------------------------|-----------------------------------------------------------------------------------------------------------------------------------------------------------------------------------------------------------------------------------------------|
| Code                                        | Description                                                               | CDC guidelines<br>(April 2020 unless otherwise noted)                                                                                                                                                                                         |
| Confirmed COVID-19 diagnosis <sup>a</sup>   |                                                                           |                                                                                                                                                                                                                                               |
| U07.1                                       | COVID-19                                                                  | For a confirmed diagnosis, assign U07.1. If the provider documents “suspected,” “possible,” “probable,” or “inconclusive” COVID-19, do not assign code U07.1. For asymptomatic individuals who test positive for COVID-19, assign code U07.1. |
| Nonspecific coronavirus diagnoses           |                                                                           |                                                                                                                                                                                                                                               |
| B34.2                                       | Coronavirus infection, unspecified                                        | N/A                                                                                                                                                                                                                                           |
| B97.21                                      | SARS-associated coronavirus as the cause of diseases classified elsewhere | N/A                                                                                                                                                                                                                                           |
| B97.29                                      | Coronavirus as cause of disease classified elsewhere                      | CDC February 2020 guideline (prior to creation of U07.1): Assign B97.29 along with codes to describe the illness (e.g., J12.89, J20.8, J22, J40, J80, or J98.8)                                                                               |
| Acute illnesses potentially due to COVID-19 |                                                                           |                                                                                                                                                                                                                                               |
| J12.81                                      | Pneumonia due to SARS-associated coronavirus                              | N/A                                                                                                                                                                                                                                           |
| J12.89                                      | Other viral pneumonia                                                     | For a pneumonia case confirmed as due to COVID-19, assign codes U07.1, COVID-19, and J12.89, Other viral pneumonia                                                                                                                            |
| J20.8                                       | Acute bronchitis due to other specified organisms                         | For a patient with acute bronchitis confirmed as due to COVID-19, assign codes U07.1 and J20.8, Acute bronchitis due to other specified organisms                                                                                             |
| J22                                         | Unspecified acute lower respiratory infection                             | If COVID-19 is documented as being associated with a lower respiratory infection, NOS, or an acute respiratory infection, NOS, codes U07.1 and J22, Unspecified acute lower respiratory infection should be assigned                          |
| J40                                         | Bronchitis not specified as acute or chronic                              | Bronchitis NOS due to COVID-19 should be coded using code U07.1 and J40, Bronchitis, not specified as acute or chronic                                                                                                                        |

**Supplemental Table S1** (Continued)

| Diagnosis codes (ICD-10-CM)                                                                                                                                                                                                                                                                                                                                                                                                                                                                                                                                                                                                                                                                                   |                                                                                                        |                                                                                                                                                                  |
|---------------------------------------------------------------------------------------------------------------------------------------------------------------------------------------------------------------------------------------------------------------------------------------------------------------------------------------------------------------------------------------------------------------------------------------------------------------------------------------------------------------------------------------------------------------------------------------------------------------------------------------------------------------------------------------------------------------|--------------------------------------------------------------------------------------------------------|------------------------------------------------------------------------------------------------------------------------------------------------------------------|
| Code                                                                                                                                                                                                                                                                                                                                                                                                                                                                                                                                                                                                                                                                                                          | Description                                                                                            | CDC guidelines<br>(April 2020 unless otherwise noted)                                                                                                            |
| J80                                                                                                                                                                                                                                                                                                                                                                                                                                                                                                                                                                                                                                                                                                           | Acute respiratory distress syndrome                                                                    | For ARDS due to COVID-19, assign codes U07.1, and J80, ARDS                                                                                                      |
| J98.8                                                                                                                                                                                                                                                                                                                                                                                                                                                                                                                                                                                                                                                                                                         | Other specified respiratory disorders                                                                  | If COVID-19 is documented as being associated with a respiratory infection, NOS, codes U07.1 and J98.8, Other specified respiratory disorders should be assigned |
| A41.89                                                                                                                                                                                                                                                                                                                                                                                                                                                                                                                                                                                                                                                                                                        | Other specified sepsis                                                                                 | For COVID-19 infection that progresses to sepsis                                                                                                                 |
| Symptoms potentially due to COVID-19                                                                                                                                                                                                                                                                                                                                                                                                                                                                                                                                                                                                                                                                          |                                                                                                        |                                                                                                                                                                  |
| R05                                                                                                                                                                                                                                                                                                                                                                                                                                                                                                                                                                                                                                                                                                           | Cough                                                                                                  | For patients presenting with any signs/symptoms associated with COVID-19 but a definitive diagnosis has not been established                                     |
| R06.02                                                                                                                                                                                                                                                                                                                                                                                                                                                                                                                                                                                                                                                                                                        | Shortness of breath                                                                                    |                                                                                                                                                                  |
| R50.9                                                                                                                                                                                                                                                                                                                                                                                                                                                                                                                                                                                                                                                                                                         | Fever, unspecified                                                                                     |                                                                                                                                                                  |
| Laboratory test codes (LOINC)                                                                                                                                                                                                                                                                                                                                                                                                                                                                                                                                                                                                                                                                                 |                                                                                                        |                                                                                                                                                                  |
| Nonantibody tests                                                                                                                                                                                                                                                                                                                                                                                                                                                                                                                                                                                                                                                                                             | Description                                                                                            |                                                                                                                                                                  |
| Antigen: 96119-3, 95942-9, 95209-3, 94558-4<br>PCR/nucleic acid detection: 94565-9, 95608-6, 95941-1, 95380-2, 95423-0, 95422-2, 96094-8, 95521-1, 94510-5, 95522-9, 94760-6, 95409-9, 94533-7, 95425-5, 94766-3, 94316-7, 94644-2, 94511-3, 94559-2, 95824-9, 94639-2, 94646-7, 94645-9, 96120-1, 94534-5, 96091-4, 94314-2, 96123-5, 94745-7, 94746-5, 94819-0, 94759-8, 95406-5, 94500-6, 94845-5, 94660-8, 94309-2, 94531-1, 95826-4, 94306-8, 94642-6, 94643-4, 94640-0, 94767-1, 94641-8, 94313-4, 94310-0, 94509-7, 96121-9, 94758-0, 95823-1, 94765-5, 94315-9, 96122-7, 94502-2, 94647-5, 94532-9, 94311-8, 94756-4, 94307-6, 94312-6, 94757-2, 94308-4, 95424-8, 94822-4, 95609-4, 95970-0, 94764-8 | Name contains "COVID 19, COVID-19, SARS coronavirus 2, SARS CoV 2, SARS-CoV-2, 2019 novel coronavirus" |                                                                                                                                                                  |

Abbreviations: ARDS, acute respiratory distress syndrome; CDC, Centers for Disease Control and Prevention; COVID-19, coronavirus 2019; ICD-10-CM, *International Classification of Diseases, 10th Revision, Clinical Modification*; N/A, not applicable; NOS, not otherwise specified; SARS-CoV-2, severe acute respiratory syndrome coronavirus 2.

<sup>a</sup>COVID-19-specific diagnosis codes (U) were introduced by the World Health Organization in late March 2020. Prior to that, the CDC recommended use of nonspecific coronavirus (B) and acutely ill diagnosis codes (J&R) to document COVID-19 infections. Z codes for screening or potential exposure to viral diseases (e.g., Z03.818, Z11.59, Z20.828) were not included as part of our COVID-19 definition because they are to be used as "rule out" codes, per CDC guidance.

**Supplemental Table S2** Codes for comorbid conditions

| Disease of interest              | ICD-10-CM                                                                                                         |
|----------------------------------|-------------------------------------------------------------------------------------------------------------------|
| Anemia                           | D50.%–D64.%                                                                                                       |
| Anxiety                          | F41.%                                                                                                             |
| Asthma                           | J45.%                                                                                                             |
| Acute MI                         | I21.%, I22.%                                                                                                      |
| Old MI                           | I25.2%                                                                                                            |
| Stable angina                    | I20.1%–I20.9%,                                                                                                    |
| Unstable angina                  | I20.0%, I24.0%                                                                                                    |
| Peripheral vascular disease      | I70.%, I71.%, I73.1%, I73.8%, I73.9%, I77.1%,<br>I79.0%, I79.2%, K55.1%, K55.8%, K55.9%, Z95.8%, Z95.9%           |
| Congestive heart failure         | I50.%                                                                                                             |
| Cancer <sup>a</sup>              | C00.%–C26.%, C30.%–C34.%, C37.%–C41.%, C43.%, C4A.%,<br>C44.%–C58.%, C60.%–C76.%, C81.%–C85.%, C88.%, C90.%–C97.% |
| COPD                             | J41.%, J42.%, J43.%, J44.%                                                                                        |
| Depression                       | F32.%, F33.%, F34.1%                                                                                              |
| Diabetes                         | E10.%–E13.%                                                                                                       |
| Hypertension                     | I10.0%–I16.0%                                                                                                     |
| Hyperlipidemia                   | E78.0%, E78.1%, E78.2%, E78.4%, E78.5%                                                                            |
| Liver cirrhosis                  | K70.3%, K74.%                                                                                                     |
| Chronic kidney disease           | N18.%                                                                                                             |
| Nonalcoholic fatty liver disease | I12.%, I13.%, K76.0%                                                                                              |
| Osteoarthritis                   | M15.%–M19.%                                                                                                       |
| Osteoporosis                     | M80.%, M81.%                                                                                                      |
| Rheumatoid arthritis             | M05.%, M06.%                                                                                                      |
| Prior stroke/TIA                 | I61.%–I66.%, G45.%                                                                                                |
| Thyroid disease                  | E00.%–E07.%                                                                                                       |
| Uveitis                          | H20.%                                                                                                             |

Abbreviations: COPD, chronic obstructive pulmonary disease; ICD-10-CM, *International Classification of Diseases, 10th Revision, Clinical Modification*; MI, myocardial infarction; TIA, transient ischemic attack.

<sup>a</sup>A diagnosis for cancer required 2 diagnosis codes for the same type of cancer at least 30 days apart.

**Supplemental Table S3** Codes for QCI

| Comorbidities                                                                      | ICD-10-CM codes <sup>50</sup>                                                                                                                                                                          | Quan 2010 weight <sup>29</sup> |
|------------------------------------------------------------------------------------|--------------------------------------------------------------------------------------------------------------------------------------------------------------------------------------------------------|--------------------------------|
| Myocardial infarction                                                              | I21.%, I22.%, I25.2%                                                                                                                                                                                   | 0                              |
| Congestive heart failure                                                           | I09.9%, I11.0%, I13.0%, I13.2%, I25.5%, I42.0%, I42.5%–I42.9%, I43.%, I50.%, P29.0%                                                                                                                    | 2                              |
| Peripheral vascular disease                                                        | I70.%, I71.%, I73.1%, I73.8%, I73.9%, I77.1%, I79.0%, I79.2%, K55.1%, K55.8%, K55.9%, Z95.8%, Z95.9%                                                                                                   | 0                              |
| Cerebrovascular disease                                                            | G45.%, G46.%, H34.0%, I60.%–I69.%                                                                                                                                                                      | 0                              |
| Dementia                                                                           | F00.%–F03.%, F05.1, G30.%, G31.1%                                                                                                                                                                      | 2                              |
| Chronic pulmonary disease                                                          | I27.8%, I27.9%, J40.%–J47.%, J60.%–J67.%, J68.4%, J70.1%, J70.3%                                                                                                                                       | 1                              |
| Connective tissue/rheumatic disease                                                | M05.%, M06.%, M31.5%, M32.%–M34.%, M35.1%, M35.3%, M36.0%                                                                                                                                              | 1                              |
| Peptic ulcer disease                                                               | K25.%–K28.%                                                                                                                                                                                            | 0                              |
| Mild liver disease                                                                 | B18.%, K70.0%–K70.3%, K70.9%, K71.3%–K71.5%, K71.7%, K73.%, K74.%, K76.0%, K76.2%–K76.4%, K76.8%, K76.9%, Z94.4%                                                                                       | 2                              |
| Diabetes without chronic complications/mild to moderate                            | E10.0%, E10.1%, E10.6%, E10.8%, E10.9%, E11.0%, E11.1%, E11.6%, E11.8%, E11.9%, E12.0%, E12.1%, E12.6%, E12.8%, E12.9%, E13.0%, E13.1%, E13.6%, E13.8%, E13.9%, E14.0%, E14.1%, E14.6%, E14.8%, E14.9% | 0                              |
| Paraplegia and hemiplegia                                                          | G04.1%, G11.4%, G80.1%, G80.2%, G81.%, G82.%, G83.0%–G83.4%, G83.9%                                                                                                                                    | 2                              |
| Renal disease                                                                      | I12.0%, I13.1%, N03.2%–N03.7%, N05.2%–N05.7%, N18.%, N19.%, N25.0%, Z49.0%–Z49.2%, Z94.0%, Z99.2%                                                                                                      | 1                              |
| Diabetes with chronic complications                                                | E10.2%–E10.5%, E10.7%, E11.2%–E11.5%, E11.7%, E12.2%–E12.5%, E12.7%, E13.2%–E13.5%, E13.7%, E14.2%–E14.5%, E14.7%                                                                                      | 1                              |
| Any malignancy, including lymphoma and leukemia, except malignant neoplasm of skin | C00.%–C26.%, C30.%–C34.%, C37.%–C41.%, C43.%, C45.%–C58.%, C60.%–C76.%, C81.%–C85.%, C88.%, C90.%–C97.%                                                                                                | 2                              |
| Moderate or severe liver disease                                                   | I85.0%, I85.9%, I86.4%, I98.2%, K70.4%, K71.1%, K72.1%, K72.9%, K76.5%, K76.6%, K76.7%                                                                                                                 | 4                              |
| Metastatic solid tumor                                                             | C77.%–C80.%                                                                                                                                                                                            | 6                              |
| AIDS/HIV                                                                           | B20.%–B22.%, B24.%                                                                                                                                                                                     | 4                              |

Abbreviations: AIDS, acquired immunodeficiency syndrome; HIV, human immunodeficiency virus; ICD-10-CM, International *Classification of Diseases 10th Revision, Clinical Modification*; QCI, Quan–Charlson comorbidity index.

The table above outlines the updated QCI index. To quantify comorbidity, the QCI score is computed by adding the weights that are assigned to the specific diagnoses. Each diagnosis is only counted once. The minimum possible score is 0, and the maximum possible score is 24.

**Supplemental Table S4** Codes for concomitant medications

| Medication class         | GPI code starts with:                                                                | HCPCS codes                                                                                                                                                                                                                                                                                                        |
|--------------------------|--------------------------------------------------------------------------------------|--------------------------------------------------------------------------------------------------------------------------------------------------------------------------------------------------------------------------------------------------------------------------------------------------------------------|
| Antianxiety agents       | 57%                                                                                  | J1990, J3360, J2060, J1790, J1810, J3410                                                                                                                                                                                                                                                                           |
| Antibiotics              | 01–08%, 1,600–1,629%, 1,699%                                                         | J0290, J0295, J2543, S0040, J0690, J1890, S0074, J0694, J0697, S0021, J0698, J0713, J0715, J0696, J0692, J0712, S0077, J2010, J1364, J0456, J2460, J2265, J0120, J0200, J0744, J1956, J2280, S0034, J1590, J0278, J1580, J1840, J1850, J3000, J3260, S0073, J0770, J1267, C9241, J1335, J2185, J3243, J0743, S0039 |
| Antidepressants          | 58%                                                                                  | J1320, S0106                                                                                                                                                                                                                                                                                                       |
| Antidiabetics            | 27%                                                                                  | J1815, J1817, E0784, S5550-S5571, C9147, S9353                                                                                                                                                                                                                                                                     |
| Antihyperlipidemics      | 39%                                                                                  | N/A                                                                                                                                                                                                                                                                                                                |
| Antihypertensives        | 36%                                                                                  | J0210, J2760, J0360, S0139, J1730, J2670                                                                                                                                                                                                                                                                           |
| Antiplatelets            | 8,515%                                                                               | J1245, J0130, J1327, J3246, C9460                                                                                                                                                                                                                                                                                  |
| Antineoplastic agents    | 21%                                                                                  | J8501-J9999                                                                                                                                                                                                                                                                                                        |
| Antiinflammatory agents  | 66%                                                                                  | J1130, J1741, J1885, J2910, J1600, J9250, J9260, J8610, J0135, J1602, J1438, J0129, J2793, J0638, J3262                                                                                                                                                                                                            |
| Beta-blockers            | 33%, 369920%, 369927%, 369988%                                                       | J1800, C9482                                                                                                                                                                                                                                                                                                       |
| Calcium channel blockers | 34%, 369915%, 369930%, 369967%, 369968%                                              | C9248                                                                                                                                                                                                                                                                                                              |
| Corticosteroids          | 22%, 8915%                                                                           | J0702, J7624, J7622, J7633, J7627, J7634, J7626, J8540, J1094, J1100, J7312, J7637, J7638, J1700, J1710, J1720, J1020, J2030, J1040, J2920, J2930, J7509, J2650, J7510, J7506, J7512, J3300, J3301, J3302, J3303, J7683, J7684                                                                                     |
| Diuretics                | 37%, 369918%, 369920%, 369940%, 369945%, 369950%, 369955%, 369960%, 369968%, 369990% | J1120, S0171, J1940, J3265, J2150, J7665, J3350, J1205,                                                                                                                                                                                                                                                            |

Abbreviations: GPI, generic product identifier; HCPCS, Healthcare Common Procedural Coding System; N/A, not applicable.

**Supplemental Table S5** Codes for medication relevant to the management of coagulopathy

| Medication class             | Subclass, if applicable             | Drug name                | Routes of administration | GPI code       | HCPCS code                               | ICD-10-CM procedure |
|------------------------------|-------------------------------------|--------------------------|--------------------------|----------------|------------------------------------------|---------------------|
| Anticoagulant                | Vitamin K antagonist                | Warfarin                 | Oral                     | 83200030%      |                                          |                     |
|                              |                                     | Factor Xa inhibitor      | Apixaban                 | Oral           | 83370010%                                |                     |
|                              | Rivaroxaban                         |                          | Oral                     | 83370060%      |                                          |                     |
|                              | Edoxaban                            |                          | Oral                     | 83370030%      |                                          |                     |
|                              | Betrixaban                          |                          | Oral                     | 83370018%      |                                          |                     |
|                              | Unfractionated heparin (UFH)        | Heparin                  | IV                       | 83100020%      | J1642, J1644                             |                     |
|                              | Low molecular weight heparin (LMWH) | Dalteparin               | SQ                       | 83101010%      | J1645                                    |                     |
|                              |                                     | Enoxaparin               | SQ                       | 83101020%      | J1650                                    |                     |
|                              |                                     | Fondaparinux             | SQ                       | 83103030%      | J1652                                    |                     |
|                              | Direct thrombin inhibitor (DTI)     | Dabigatran               | Oral                     | 83337030%      |                                          |                     |
|                              |                                     | Lepirudin                | IV                       | 83334050%      | J1945                                    |                     |
|                              |                                     | Desirudin                | IV                       | 83334030%      |                                          |                     |
|                              |                                     | Bivalirudin              | IV                       | 83334020%      | J0583                                    |                     |
|                              |                                     | Argatroban               | IV                       | 83337015%      | J0883, J0884                             |                     |
| Antiplatelet                 |                                     | Aspirin                  | Oral                     | 64100010%      |                                          |                     |
|                              |                                     | Clopidogrel              | Oral                     | 85158020%      |                                          |                     |
|                              |                                     | Prasugrel                | Oral                     | 85158060%      |                                          |                     |
|                              |                                     | Ticlopidine              | Oral                     | 85158080%      |                                          |                     |
|                              |                                     | Dipyridamole             | Oral                     | 85150030%      |                                          |                     |
|                              |                                     | Ticagrelor               | Oral                     | 85158470%      |                                          |                     |
|                              |                                     | Cangrelor                | IV                       | 8515842520%    |                                          |                     |
|                              |                                     | Aspirin and dipyridamole | Oral                     | 85159902206920 |                                          |                     |
|                              |                                     | Cilostazol               | Oral                     | 85155516%      |                                          |                     |
| Tissue plasminogen activator |                                     | Alteplase                | IV                       | 85601010%      | J2997                                    |                     |
|                              |                                     | Anistreplase             | IV                       | 85601020%      | J0350                                    |                     |
|                              |                                     | Retepase                 | IV                       | 85601070%      | J2993                                    |                     |
|                              |                                     | Tenecteplase             | IV                       | 85601075%      | J3101                                    |                     |
| Antivirals                   |                                     | Remdesivir               | IV                       | 12700080%      |                                          | XW033E5, XW043E5    |
| Corticosteroids              |                                     | Dexamethasone            | Oral, IV                 | 22100020%      | J1094, J1100, J8540                      |                     |
|                              |                                     | Prednisone               | Oral, IV                 | 22100045%      | J7506, J7512                             |                     |
|                              |                                     | Methylprednisolone       | Oral, IV                 | 22100030%      | J1020, J1030, J1040, J2920, J2930, J7509 |                     |
|                              |                                     | Hydrocortisone           | Oral, IV                 | 22100025%      | J1700, J1710, J1720                      |                     |
| Convalescent plasma          |                                     |                          |                          |                |                                          | XW13325, XW14325    |
| Antithrombin III             |                                     | Atryn                    | IV                       | 85400015202120 |                                          |                     |
|                              |                                     | Thrombate III            | IV                       | 854000151021%  |                                          |                     |

Abbreviations: GPI, generic product identifier; HCPCS, Healthcare Common Procedural Coding System; ICD-10-CM, *International Classification of Diseases, 10th Revision, Clinical Modification*; IV, intravenous; SQ, subcutaneous.

**Supplemental Table S6** Codes for thromboembolic events of interest

| Thromboembolic event                     | ICD-10-CM diagnosis/procedure codes                                                                                                      | CPT codes                                                                                                                                                                                   |
|------------------------------------------|------------------------------------------------------------------------------------------------------------------------------------------|---------------------------------------------------------------------------------------------------------------------------------------------------------------------------------------------|
| Ischemic stroke                          | I63.0%                                                                                                                                   | N/A                                                                                                                                                                                         |
| Myocardial infarction                    | I21.0%, I22.0%                                                                                                                           | N/A                                                                                                                                                                                         |
| Deep vein thrombosis                     | I80.1%, I80.2%, I80.3%, I82.4%, I82.6%, I82.A1%, I82.B1%, I82.C1%, I82.90%                                                               | N/A                                                                                                                                                                                         |
| Pulmonary embolism                       | I26.0%                                                                                                                                   | N/A                                                                                                                                                                                         |
| Acute limb ischemia                      | I70.22, I70.25, I70.26                                                                                                                   | N/A                                                                                                                                                                                         |
| Major nontraumatic lower limb amputation | 0Y62, 0Y63, 0Y64, 0Y67, 0Y68, 0Y6C, 0Y6D, 0Y6F, 0Y6G, 0Y6H, 0Y6J, 0Y6M, 0Y6N, 0Y6P, 0Y6Q, 0Y6R, 0Y6S, 0Y6T, 0Y6U, 0Y6V, 0Y6W, 0Y6X, 0Y6Y | 27290, 27295, 27590, 27591, 27592, 27594, 27596, 27598, 27880, 27881, 27882, 27884, 27886, 27888, 27889, 28130, 28140, 28800, 28805, 28810, 28820, 28825, 28124, 28126, 28150, 28153, 28160 |

Abbreviations: CPT, current procedural terminology; ICD-10-CM, *International Classification of Diseases, 10th Revision, Clinical Modification*; N/A, not applicable.

**Supplemental Table S7** Demographics and baseline<sup>a</sup> clinical characteristics of overall COVID-19 cohort

|                                 |                 |
|---------------------------------|-----------------|
| Number of patients              | 181,995         |
| Age, years                      |                 |
| Mean (SD)                       | 49.99 (18.70)   |
| Age group, years, <i>n</i> (%)  |                 |
| 18–24                           | 18,047 (9.92)   |
| 25–34                           | 27,893 (15.33)  |
| 35–44                           | 28,217 (15.50)  |
| 45–54                           | 31,565 (17.34)  |
| 55–64                           | 33,661 (18.50)  |
| 65+                             | 42,612 (23.41)  |
| Sex, <i>n</i> (%)               |                 |
| Male                            | 81,325 (44.69)  |
| Female                          | 100,670 (55.31) |
| Race, <i>n</i> (%)              |                 |
| African American                | 23,752 (13.05)  |
| Asian                           | 3,366 (1.85)    |
| Caucasian                       | 128,741 (70.74) |
| Other/unknown                   | 26,136 (14.36)  |
| Ethnicity, <i>n</i> (%)         |                 |
| Hispanic                        | 20,938 (11.50)  |
| Not Hispanic                    | 145,367 (79.87) |
| Unknown                         | 15,690 (8.62)   |
| Geographic region, <i>n</i> (%) |                 |
| Northeast                       | 28,874 (15.87)  |
| West                            | 11,807 (6.49)   |
| Midwest                         | 99,124 (54.47)  |
| South                           | 35,767 (19.65)  |
| Other/unknown                   | 6,423 (3.53)    |

**Supplemental Table S7** (Continued)

|                                            |                 |
|--------------------------------------------|-----------------|
| <b>Number of patients</b>                  | <b>181,995</b>  |
| Insurance type, <i>n</i> (%)               |                 |
| Commercial                                 | 83,398 (45.82)  |
| Medicaid                                   | 12,062 (6.63)   |
| Medicare                                   | 18,710 (10.28)  |
| Others                                     | 35,878 (19.71)  |
| Uninsured                                  | 2,196 (1.21)    |
| Unknown                                    | 4,021 (2.21)    |
| Missing                                    | 25,730 (14.14)  |
| BMI (kg/m <sup>2</sup> )                   |                 |
| Patients with BMI measure, <i>n</i> (%)    | 113,991 (62.63) |
| Mean BMI (SD) <sup>b</sup>                 | 31.52 (8.08)    |
| BMI category, <i>n</i> (%) <sup>b</sup>    |                 |
| Underweight                                | 1,091 (0.96)    |
| Normal                                     | 21,271 (18.66)  |
| Overweight                                 | 32,486 (28.50)  |
| Obese                                      | 59,143 (51.88)  |
| Obesity class, <i>n</i> (%) <sup>b</sup>   |                 |
| Class 1 (BMI 30.0–34.9 kg/m <sup>2</sup> ) | 27,592 (24.21)  |
| Class 2 (BMI 35.0–39.9 kg/m <sup>2</sup> ) | 16,541 (14.51)  |
| Class 3 (BMI ≥40 kg/m <sup>2</sup> )       | 15,010 (13.17)  |
| QCI, mean (SD)                             | 0.62 (1.39)     |
| Individual comorbidity, <i>n</i> (%)       |                 |
| Hypertension                               | 52,419 (28.80)  |
| Hyperlipidemia                             | 44,210 (24.29)  |
| Diabetes                                   | 26,001 (14.29)  |
| Anxiety                                    | 22,540 (12.38)  |
| Depression                                 | 18,466 (10.15)  |
| Thyroid disease                            | 16,832 (9.25)   |
| Osteoarthritis                             | 15,289 (8.40)   |
| Anemia                                     | 14,218 (7.81)   |
| Asthma                                     | 12,027 (6.61)   |
| Chronic kidney disease                     | 11,185 (6.15)   |
| Sleep apnea                                | 10,713 (5.89)   |
| Nonalcoholic fatty liver disease           | 10,307 (5.66)   |
| Chronic obstructive pulmonary disease      | 7,629 (4.19)    |
| Congestive heart failure                   | 7,493 (4.12)    |
| Cancer <sup>c</sup>                        | 7,381 (4.06)    |
| Prior stroke/transient ischemic attack     | 4,698 (2.58)    |
| Osteoporosis                               | 3,670 (2.02)    |
| Peripheral vascular disease                | 3,634 (2.00)    |
| Old MI                                     | 3,109 (1.71)    |
| Rheumatoid arthritis                       | 1,960 (1.08)    |
| Liver cirrhosis                            | 1,033 (0.57)    |

(Continued)



**Supplemental Table S7** (Continued)

|                                          |                |
|------------------------------------------|----------------|
| <b>Number of patients</b>                | <b>181,995</b> |
| Stable angina                            | 1,044 (0.57)   |
| Unstable angina                          | 432 (0.24)     |
| Uveitis                                  | 136 (0.07)     |
| Prior thromboembolic event, <i>n</i> (%) |                |
| Ischemic stroke                          | 2,118 (1.16)   |
| MI                                       | 1,990 (1.09)   |
| DVT                                      | 1,471 (0.81)   |
| PE                                       | 955 (0.52)     |
| ALI                                      | 183 (0.10)     |
| Major nontraumatic lower limb amputation | 272 (0.15)     |

Abbreviations: ALI, acute limb ischemia; BMI, body mass index; COVID-19, coronavirus 2019; DVT, deep vein thrombosis; MI, myocardial infarction; PE, pulmonary embolism; QCI, Quan–Charlson comorbidity index; SD, standard deviation.

<sup>a</sup>The baseline period was defined as the 12 months prior to the index date.

<sup>b</sup>Mean BMI, BMI categories, and obesity classes were identified among hospitalized patients with a BMI measure available (*n* = 113,991).

<sup>c</sup>A diagnosis for cancer required two diagnosis codes for the same type of cancer at least 30 days apart.

**Supplemental Table S8** Exploratory analysis: feasibility of assessing risk stratification scores in hospitalized COVID-19 patients (*n* = 40,524)

| Score                                                                                                         | Component                         | Patients with value, <i>n</i> (%) |
|---------------------------------------------------------------------------------------------------------------|-----------------------------------|-----------------------------------|
| NOCOS calculator<br><a href="https://feinstein.northwell.edu/NOCOS">https://feinstein.northwell.edu/NOCOS</a> | Age                               | 40,524 (100.00)                   |
|                                                                                                               | Oxygen saturation (%)             | 39,015 (96.28)                    |
|                                                                                                               | Absolute neutrophil count (K/uL)  | 39,223 (96.79)                    |
|                                                                                                               | Red cell distribution width (%)   | 40,299 (99.44)                    |
|                                                                                                               | Serum sodium (mmol/L)             | 26,645 (65.75)                    |
|                                                                                                               | Serum blood urea nitrogen (mg/dL) | 39,591 (97.70)                    |
| IMPROVE-DD VTE risk score<br>The IMPROVE-DD VTE risk assessment algorithms<br>(practical-haemostasis.com)     | Previous VTE                      | 1,108 (2.73)                      |
|                                                                                                               | Known thrombophilia               | 427 (1.05)                        |
|                                                                                                               | Current lower limb paralysis      | 110 (0.27)                        |
|                                                                                                               | Current cancer                    | 2,181 (5.38)                      |
|                                                                                                               | Immobilized $\geq$ 7 d            | 24,579 (60.65)                    |
|                                                                                                               | ICU or CCU stay                   | 8,630 (21.30)                     |
|                                                                                                               | Patient age >60 y                 | 24,501 (60.46)                    |
| D-dimer level <sup>a</sup>                                                                                    | 30,153 (74.41)                    |                                   |

Abbreviations: CCU, cardiac care unit; COVID-19, coronavirus 2019; ICU, intensive care unit; NOCOS, Northwell COVID-19 Survival; VTE, venous thromboembolism.

<sup>a</sup>Patients with available D-dimer level. Note the risk score cutoff is two times the upper limit of normal.

**Supplemental Table S9** Subgroup analysis: thromboembolic events during follow-up period by ICU stay<sup>a</sup>

|                                                           | Hospitalized COVID-19 patients<br>(n = 40,524) |               |
|-----------------------------------------------------------|------------------------------------------------|---------------|
|                                                           | Without ICU stay                               | With ICU stay |
| Number of patients                                        | 31,894                                         | 8,630         |
| Occurrence of thromboembolic events, n (%)                |                                                |               |
| Any of the thromboembolic events of interest <sup>b</sup> | 5,030 (15.77)                                  | 2,083 (24.14) |
| Ischemic stroke                                           | 1,122 (3.52)                                   | 422 (4.89)    |
| MI                                                        | 2,219 (6.96)                                   | 900 (10.43)   |
| DVT                                                       | 1,136 (3.56)                                   | 625 (7.24)    |
| PE                                                        | 1,307 (4.10)                                   | 542 (6.28)    |
| ALI                                                       | 71 (0.22)                                      | 18 (0.21)     |
| Major nontraumatic lower limb amputation                  | 96 (0.30)                                      | 22 (0.25)     |
| Time to first event (days), mean (SD) <sup>c</sup>        |                                                |               |
| Any of the thromboembolic events of interest <sup>b</sup> | 16.2 (36.9)                                    | 12.1 (26.3)   |
| Ischemic stroke                                           | 25.8 (50.3)                                    | 18.1 (36.9)   |
| MI                                                        | 13.7 (34.3)                                    | 8.8 (21.7)    |
| DVT                                                       | 24.4 (45.0)                                    | 18.6 (32.9)   |
| PE                                                        | 15.3 (32.4)                                    | 12.9 (23.4)   |
| ALI                                                       | 44.0 (60.2)                                    | 18.1 (43.5)   |
| Major nontraumatic lower limb amputation                  | 33.6 (58.0)                                    | 33.3 (47.4)   |

Abbreviations: ALI, acute limb ischemia; COVID-19, coronavirus 2019; DVT, deep vein thrombosis; ICU, intensive care unit; MI, myocardial infarction; PE, pulmonary embolism; SD, standard deviation.

<sup>a</sup>ICU stay was identified during COVID-19 hospitalization.

<sup>b</sup>The thromboembolic events of interest included ischemic stroke, MI, DVT, PE, ALI, and major nontraumatic lower limb amputation.

<sup>c</sup>Time to first event was examined among patients with the event.
